# Supplementary material for: The deca-GX3 proteins Yae1-Lto1 function as adaptors recruiting the ABC protein Rli1 for iron-sulfur cluster insertion
Source: eLife journal article supplement (doi:10.7554/elife.08231), 2015-07-16

Figure 1-Figure supplement 1 (Paul et al.)

A

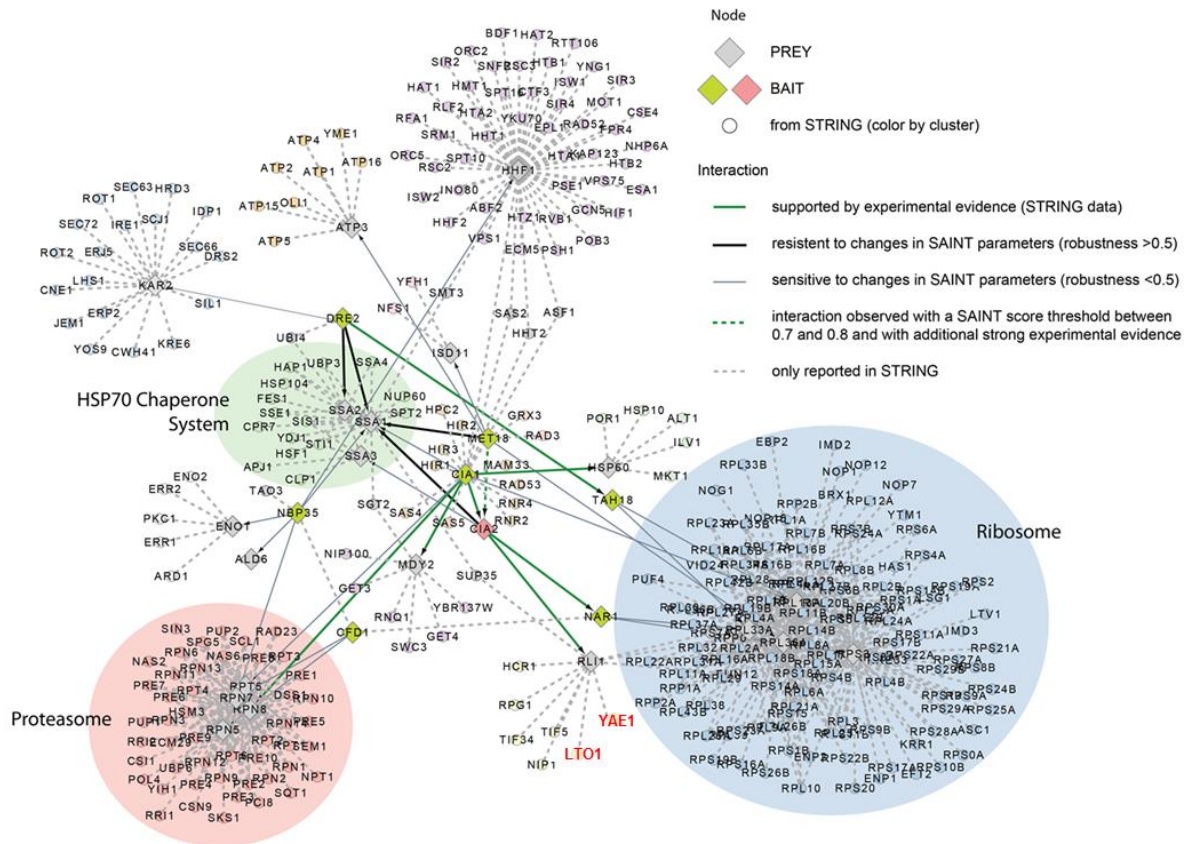

B

|                           |                 |                        | Number of unique peptides    |      |      |      |       |      |       |         |
|---------------------------|-----------------|------------------------|------------------------------|------|------|------|-------|------|-------|---------|
|                           |                 |                        | Pull-down experiment by bait |      |      |      |       |      |       | Control |
|                           |                 |                        | Cfd1                         | Cia1 | Cia2 | Dre2 | Met18 | Nar1 | Nbp35 |         |
| Identified protein (prey) | Systematic name | Molecular weight [kDa] | Cfd1                         | Cia1 | Cia2 | Dre2 | Met18 | Nar1 | Nbp35 |         |
| Cfd1                      | YIL003W         | 32                     | 20                           | 0    | 0    | 0    | 0     | 0    | 2     | 0       |
| Cia1                      | YDR267C         | 37                     | 0                            | 13   | 6    | 0    | 1     | 0    | 0     | 0       |
| Cia2                      | YHR122W         | 26                     | 0                            | 10   | 19   | 0    | 6     | 0    | 0     | 0       |
| Dre2                      | YKR071C         | 39                     | 0                            | 1    | 0    | 32   | 0     | 7    | 0     | 1       |
| Met18                     | YIL128W         | 118                    | 0                            | 9    | 13   | 0    | 45    | 0    | 0     | 0       |
| Nar1                      | YNL240C         | 54                     | 0                            | 11   | 24   | 0    | 2     | 34   | 0     | 0       |
| Nbp35                     | YGL091C         | 35                     | 0                            | 0    | 0    | 0    | 0     | 0    | 16    | 0       |
| Tah18                     | YPR048W         | 72                     | 0                            | 0    | 0    | 61   | 0     | 3    | 0     | 0       |
| Lto1                      | YNL260C         | 23                     | 0                            | 5    | 7    | 0    | 4     | 0    | 0     | 0       |
| Yae1                      | YJR067C         | 16                     | 0                            | 3    | 3    | 0    | 0     | 0    | 0     | 0       |
| Rli1                      | YDR091C         | 68                     | 0                            | 16   | 19   | 0    | 3     | 0    | 0     | 0       |

C

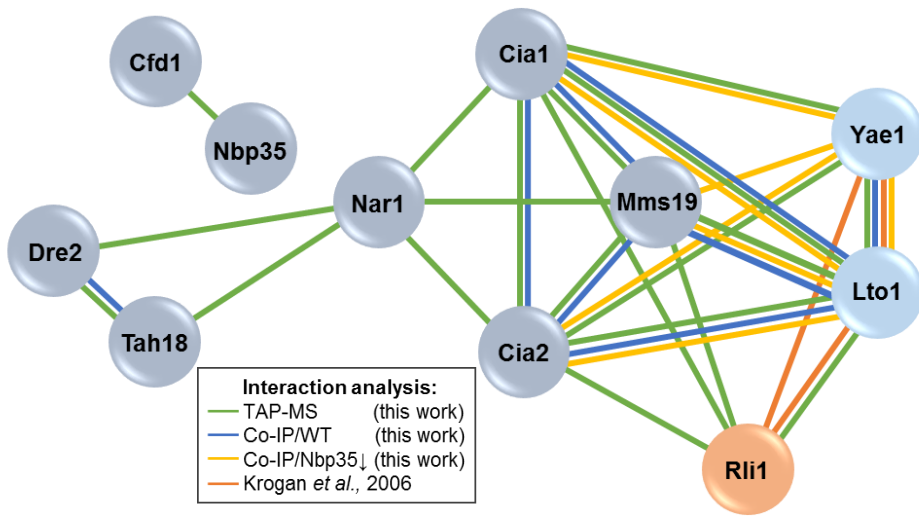

Supplement: supp [file elife_poa_e08231_Figure_1_figure_supplement_1.pdf › elife_poa_e08231_Figure_1_figure_supplement_1.pdf]
