# Supplementary material for: The deca-GX3 proteins Yae1-Lto1 function as adaptors recruiting the ABC protein Rli1 for iron-sulfur cluster insertion
Source: eLife. 2015 Jul 16;4:e08231. doi: 10.7554/eLife.08231 (PMC4523923; doi:10.7554/eLife.08231)
Supplement: Supplementary file 1. — S. cerevisiae strains, Oligonucleotides and Expression vectors. DOI: http://dx.doi.org/10.7554/eLife.08231.017 [file elife08231s001.xlsx]

## Sheet: S. cerevisiae strains
Strain	Genotype	Reference
W303-1A	MATa ura3-1 ade2-1 trp1-1 his3-11,15 leu2-3,112 can1-100	Euroscarf
Gal-LTO1	W303-1A, pLTO1::GALL-natNT2	This work
Gal-LTO1long	W303-1A, pLTO1::GALL-natNT2	This work
	(promoter insertion in front of wrong start codon)
Gal-NBP35	W303-1A, pNBP35::GAL1-10-HIS3	Hausmann et al., 2005
Gal-Yae1	W303-1A, pYAE1::GALL-natNT2	This work
Gal-YAH1	W303-1A, pYAH1::GAL1-10-LEU2	Lange et al., 2000
Tet-RLI1	W303-1A, pRLI1::TetO7-kanMX4	Kispal et al., 2005
Yae1-psd	W303-1A, YAE1-3Myc-AtLOV2E139N-cODC1:: kanMX4	This work
Lto1-psd	W303-1A, LTO1-3Myc-AtLOV2E139N-cODC1:: kanMX4	This work
SC0000	MATa ade2 arg4 leu2-3,112 trp1-289 ura3-52	Euroscarf
Cfd1-TAP (#SC2492)	SC0000, CFD1-TAP::URA3	Euroscarf
Cia1-TAP (#SC2420)	SC0000, CIA1-TAP::URA3	Euroscarf
Cia2-TAP (#SC1114)	SC0000, CIA2-TAP::URA3	Euroscarf
Dre2-TAP (#SC1243)	SC0000, DRE2-TAP::URA3	Euroscarf
Met18-TAP (#SC2096)	SC0000, MET18-TAP::URA3	Euroscarf
Nar1-TAP (#SC1416)	SC0000, NAR1-TAP::URA3	Euroscarf
Nbp35-TAP (#SC0234)	SC0000, NBP35-TAP::URA3	Euroscarf

## Sheet: Oligonucleotides
Gene	Oligonucleotide	Sequence (5‘→3‘)
LTO1 (wrong start)	Ynl260c_S1	GTAGCCATTTGCCTTTTCAGTATAATCTTACTAATATAAAAATCTCAATCATGCGTACGCTGCAGGTCGAC
	Ynl260c_S4	GATTTAAACAAGTTTTTTTTCATTTTTCTTATAAAACGATTTCTCACCATCGATGAATTCTCTGTCG
LTO1	Ynl260c_SV_S1	CTTATCATATTTGAAGAGTAAATGGAAAGTAAAGATCACTGGACAAATAAAAATGCGTACGCTGCAGGTCGAC
	Ynl260c_SV_S4	AAACCTTCTTGGTAATACTGTTCTTCTAGGTTTAGTAAATTATCAAAATCCATCGATGAATTCTCTGTCG
	Ynl260c_S2	GTTTAGTTGCTCTTTTTGGCGGCCGGCGATAATGTTCTTCACTTGGTATTCTTAATCGATGAATTCGAGCTCG
	Ynl260C_S3	ATGAAGACATCGCAAAGAATAAGACAAAACAAAATCAGGCTCAATCCTGGCGTACGCTGCAGGTCGAC
YAE1	Yae1_S1	TTGATAGAAGAGAACAAAAAAGGAACAGTGTTACAATAGTATATAGAGATGCGTACGCTGCAGGTCGAC
	Yae1_S4	TTCAGTTTCGACATCACTGTCTGATGCCCATACATCGTCCCAAGTATTCGACATCGATGAATTCTCTGTCG
	Yae1_S2	TGATATAAGGTACATAAATTGTGAAATCAACTCCATTTAAAACAACTTTAATCGATGAATTCGAGCTCG
	Yae1_S3	ACTGATATTGCCAATACCTATTGTGAAAAGTACCATGTGCCATCTATCCAACGTACGCTGCAGGTCGAC

## Sheet: Expression vectors
Plasmid	Gene	Tag	Promoter	Marker	Reference
Fe-S target protein constructs
p416-Nar1-3HA	NAR1	3HA,	MET25	URA3	Hausmann et al., 2005
		C-terminal
p416-3HA-Nbp35	NBP35	3HA,	MET25	URA3	Netz et al., 2012a
		N-terminal
p426-TDH3-Ntg2-3HA	NTG2	3HA,	TDH3	URA3	Balk et al., 2004
		C-terminal
p416-MET25-	POL3-CTD	3HA,	MET25	URA3	Netz et al., 2012b
3HA-Pol3-CTD		N-terminal
p424-TDH3-Pol31	POL31	-	TDH3	TRP1	Netz et al., 2012b
p424-TDH3-Rad3-3HA	RAD3	3HA,	TDH3	TRP1	This work
		C-terminal
p424-NPRli1-Rli1-3HA	RLI1	3HA,	pRLI1	TRP1	Kispal et al., 2005
		C-terminal
p426-NPRli1-Rli1C25S-3HA	RLI1C25S	3HA,	pRLI1	URA3	Kispal et al., 2005
		C-terminal
p426-NPRli1-Rli1C61S-3HA	RLI1C61S	3HA,	pRLI1	URA3	Kispal et al., 2005
		C-terminal
p426-NPRli1-Rli1C25;61S-3HA	RLI1C25;61S	3HA,	pRLI1	URA3	Kispal et al., 2005
		C-terminal
p424-NPRli1-Rli1-Myc	RLI1	1Myc,	pRLI1	TRP1	This work
		C-terminal
Yae1 constructs
p426-NPYae1-Yae1	YAE1	-	pYAE1	URA3	This work
p424-TDH3-	YAE1	1Myc,	TDH3	TRP1	This work
Yae1-Myc		C-terminal
p426-TDH3-	YAE1	3HA,	TDH3	URA3	This work
3HA-Yae1		N-terminal
Lto1 constructs
p426-NPLto1-Lto1	LTO1	-	pLTO1	URA3	This work
p416-NPLto1-Lto1	LTO1	-	pLTO1	URA3	This work
p416-NPLto1-Lto1_D4A	LTO1D4A	-	pLTO1	URA3	This work
p416-NPLto1-Lto1_G17;21A	LTO1G17;21A	-	pLTO1	URA3	This work
p416-NPLto1-Lto1_G33;37;41A	LTO1G33;37;41A	-	pLTO1	URA3	This work
p416-NPLto1-Lto1_G49;53A	LTO1G49;53A	-	pLTO1	URA3	This work
p416-NPLto1-Lto1_W162A	LTO1W162A	-	pLTO1	URA3	This work
p424-TDH3-	LTO1	1Myc,	TDH3	TRP1	This work
Lto1-Myc		C-terminal
p426-TDH3-	LTO1	3HA,	TDH3	URA3	This work
3HA-Lto1		N-terminal
p426-TDH3-	LTO1D4A	3HA,	TDH3	URA3	This work
3HA-Lto1_D4A		N-terminal
p426-TDH3-	LTO1G17;21A	3HA,	TDH3	URA3	This work
3HA-Lto1_G17;21A		N-terminal
p426-TDH3-	LTO1G33;37;41A	3HA,	TDH3	URA3	This work
3HA-Lto1_G33;37;41A		N-terminal
p426-TDH3-	LTO1G49;53A	3HA,	TDH3	URA3	This work
3HA-Lto1_G49;53A		N-terminal
p426-TDH3-	LTO1W162A	3HA,	TDH3	URA3	This work
3HA-Lto1_W162A		N-terminal
p414-NPLto1_M01mut-LTO1	LTO1;ATG1→STOP	-	pLTO1	TRP1	This work
p414-NPLto1_M01M10mut-LTO1	LTO1;ATG1/2→STOP	-	pLTO1	TRP1	This work
p414-NPLto1_567-1-LUX	luc2	-	pLTO1-567 to 1	TRP1	This work
p414-NPLto1_567-46-LUX	luc2	-	pLTO1-567 to -46	TRP1	This work
p414-NPLto1_567-109-LUX	luc2	-	pLTO1-567 to -109	TRP1	This work
p414-NPLto1_567-198-LUX	luc2	-	pLTO1-567 to -198	TRP1	This work
Construct for Yae1-Lto1 co-expression
p416-MET25-Lto1-	LTO1	-	MET25	URA3	This work
NPYae1-Yae1	YAE1	-	pYAE1
Human YAE1D1 and ORAOV1 constructs
p424-TDH3-YAE1D1	YAE1D1	-	TDH3	TRP1	This work
p426-TDH3-YAE1D1	YAE1D1	-	TDH3	URA3	This work
p424-TDH3-ORAOV1	ORAOV1	-	TDH3	TRP1	This work
p426-TDH3-ORAOV1	ORAOV1	-	TDH3	URA3	This work
p426-MET25-ORAOV1-TDH3-YAE1D1	ORAOV1	-	MET25	URA3	This work
	YAE1D1	-	TDH3
