# Supplementary figures and images for: The deca-GX3 proteins Yae1-Lto1 function as adaptors recruiting the ABC protein Rli1 for iron-sulfur cluster insertion
Source: eLife journal article supplement (doi:10.7554/elife.08231), 2015-07-16

**A**

# B

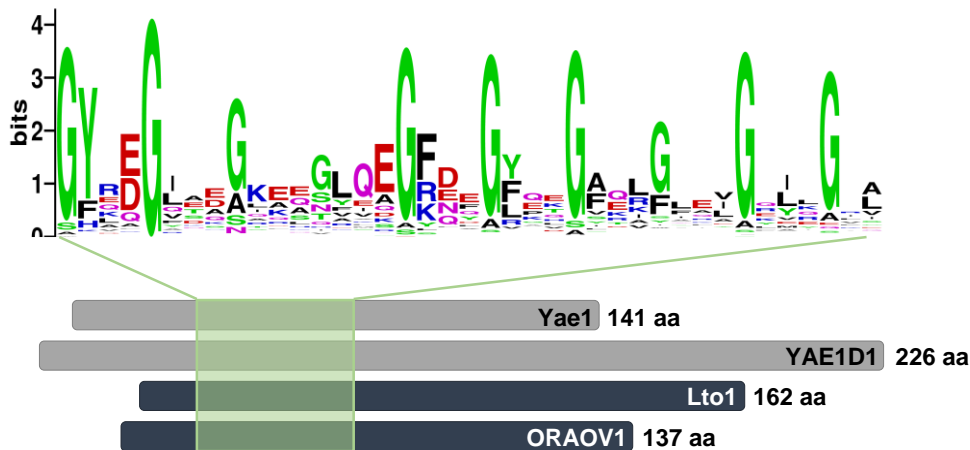

Supplement: supp [file elife_poa_e08231_Figure_2_figure_supplement_1.pdf › elife_poa_e08231_Figure_2_figure_supplement_1.pdf]

Figure 2-Figure supplement 2 (Paul *et al.*)

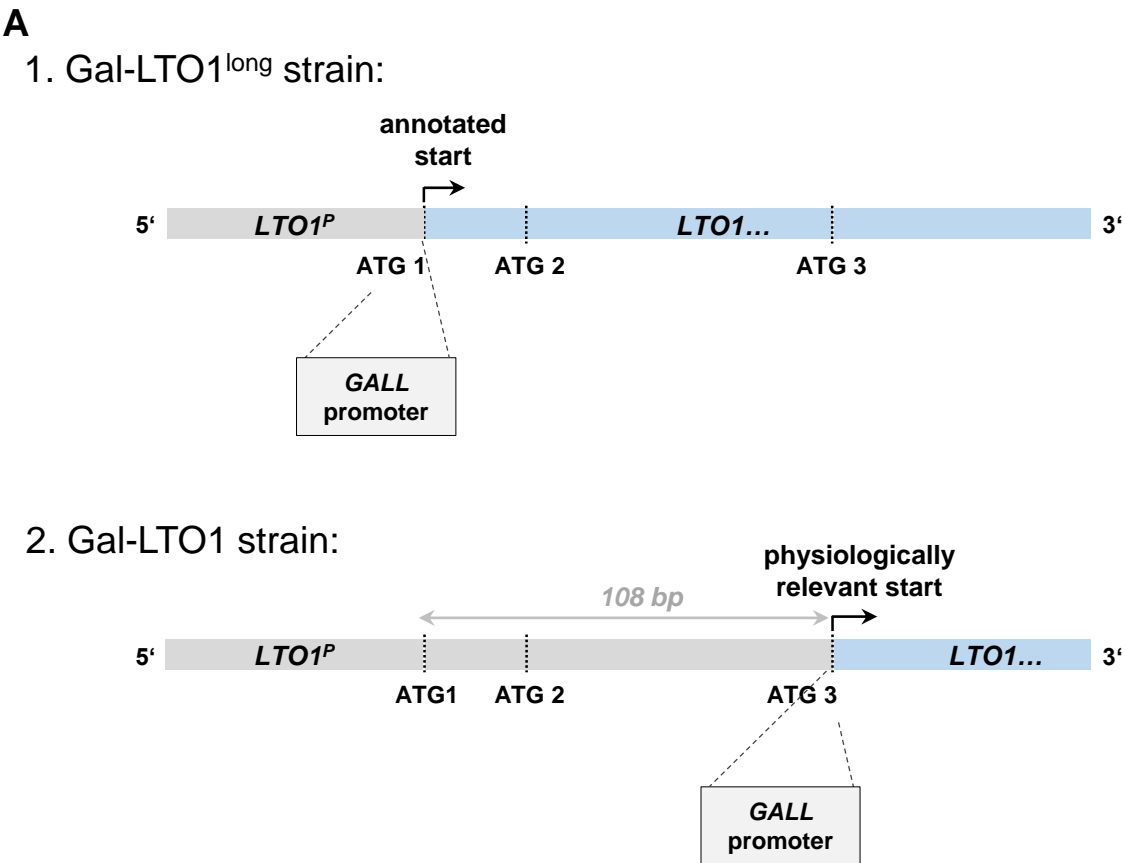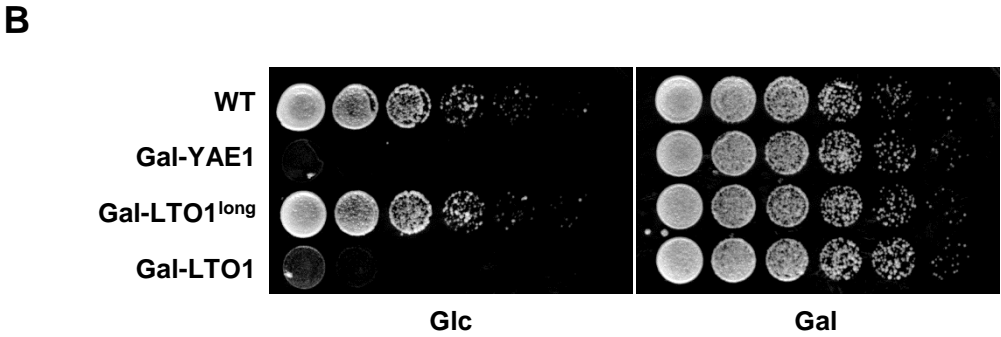

Supplement: supp [file elife_poa_e08231_Figure_2_figure_supplement_2.pdf › elife_poa_e08231_Figure_2_figure_supplement_2.pdf]

Figure 2-Figure supplement 3 (Paul *et al.*)

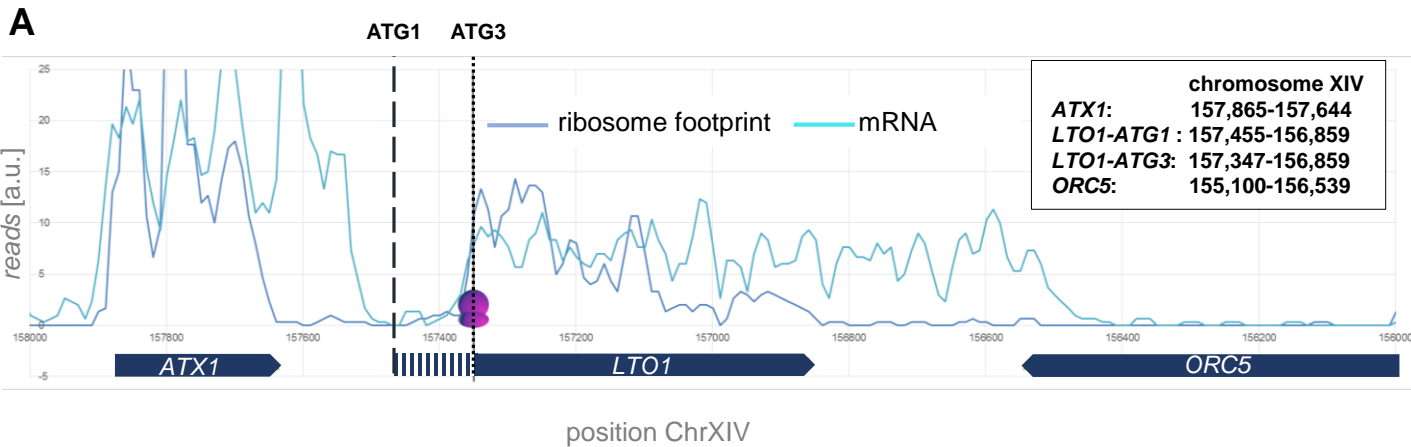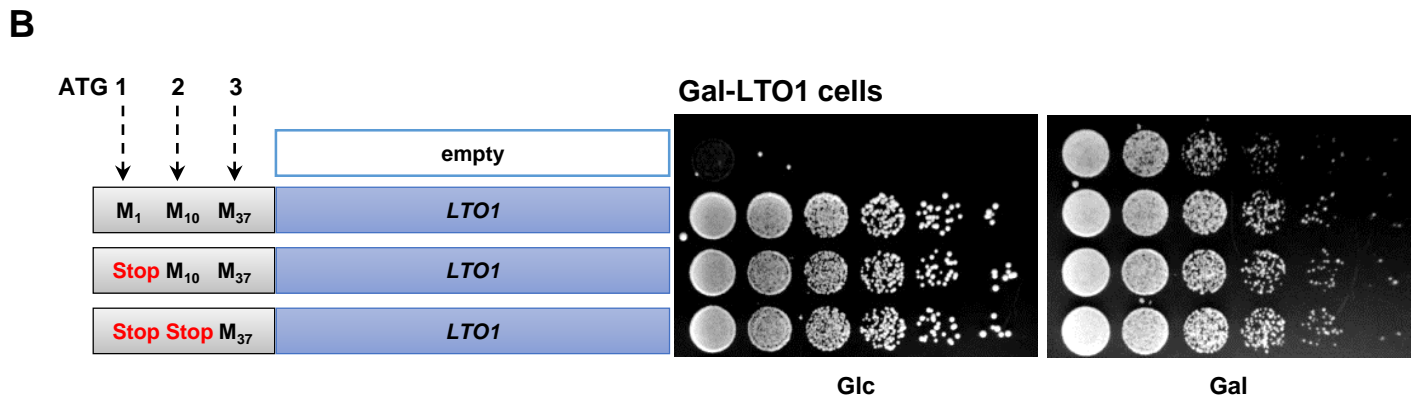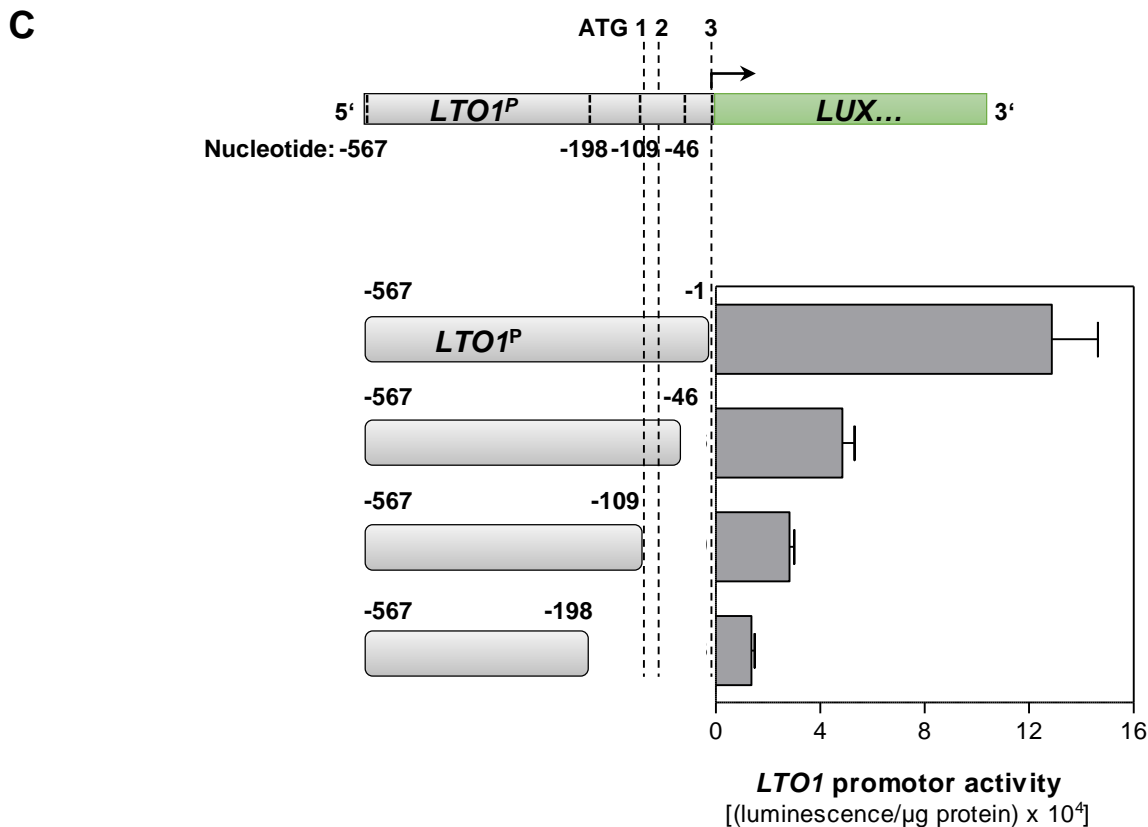

Supplement: supp [file elife_poa_e08231_Figure_2_figure_supplement_3.pdf › elife_poa_e08231_Figure_2_figure_supplement_3.pdf]

Figure 3-Figure supplement 1 (Paul *et al.*)

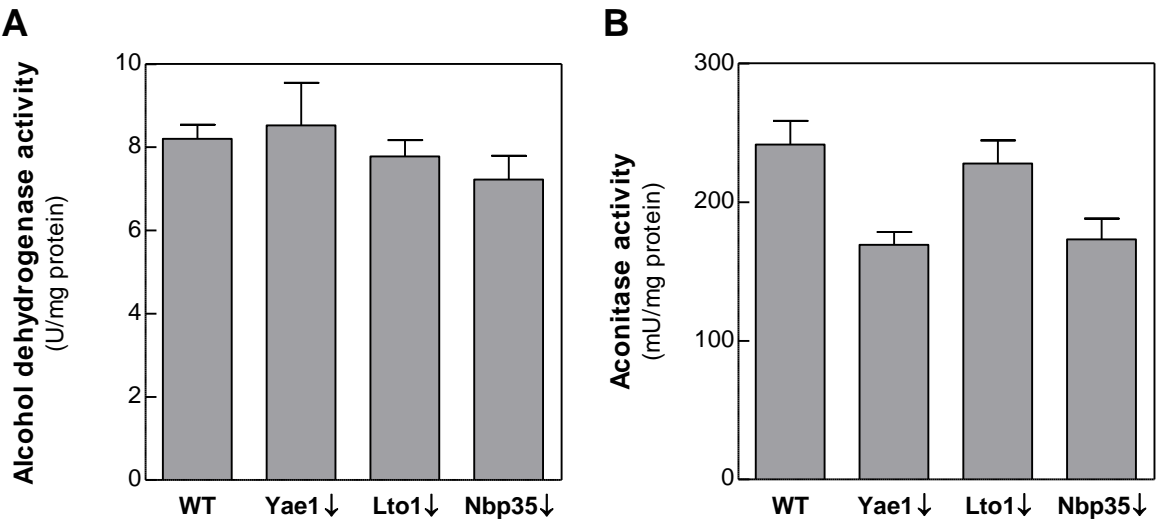

Supplement: supp [file elife_poa_e08231_Figure_3_figure_supplement_1.pdf › elife_poa_e08231_Figure_3_figure_supplement_1.pdf]

Figure 4-Figure supplement 1 (Paul *et al.*)

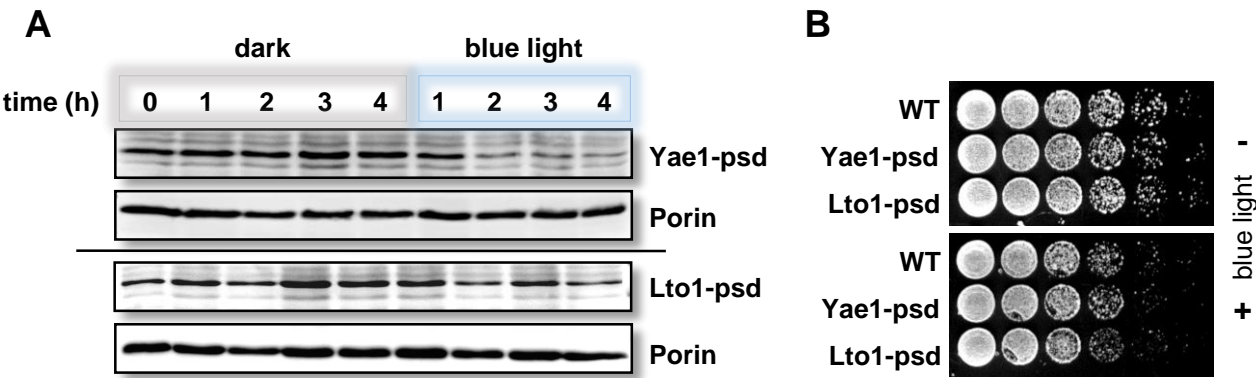

Supplement: supp [file elife_poa_e08231_Figure_4_figure_supplement_1.pdf › elife_poa_e08231_Figure_4_figure_supplement_1.pdf]
